# Supplementary material for: Antagonism of miR-33 in mice promotes reverse cholesterol transport and regression of atherosclerosis
Source: JCI journal article supplement (doi:10.1172/jci57275), 2011-06-06
Supplement: sd1 [file 1]

**Supplemental Table I. Immune response genes down-regulated in anti-miR33 treated plaque macrophages.**

| ID            | Gene Name                                                                                         | fold change (anti-miR33 vs. control) | p-value |
|---------------|---------------------------------------------------------------------------------------------------|--------------------------------------|---------|
| Oas1c         | 2'-5' oligoadenylate synthetase 1C                                                                | -1.48                                | 0.0119  |
| Oas1f         | 2'-5' oligoadenylate synthetase 1F                                                                | -1.23                                | 0.0252  |
| Clec4n        | C-type lectin domain family 4, member n                                                           | -2.37                                | 0.0392  |
| Clec5a        | C-type lectin domain family 5, member a                                                           | -1.87                                | 0.0112  |
| Cd8a          | CD8 antigen, alpha chain                                                                          | -2.57                                | 0.0247  |
| Cd8b1         | CD8 antigen, beta chain 1                                                                         | -1.76                                | 0.0032  |
| Fcgr3         | Fc receptor, IgG, low affinity III                                                                | -1.2                                 | 0.021   |
| Fcgr2b        | Fc receptor, IgG, low affinity IIb                                                                | -1.36                                | 0.0016  |
| Pou2f2        | POU domain, class 2, transcription factor 2                                                       | -1.17                                | 0.0461  |
| AF251705      | cDNA sequence AF251705                                                                            | -1.43                                | 0.0235  |
| Ccl9          | chemokine (C-C motif) ligand 9                                                                    | -1.43                                | 0.0218  |
| Cxcl15        | chemokine (C-X-C motif) ligand 15                                                                 | -1.34                                | 0.0098  |
| C1qb          | complement component 1, q subcomponent, beta polypeptide                                          | -1.11                                | 0.0363  |
| C9            | complement component 9                                                                            | -1.33                                | 0.012   |
| Lilrb4, Gp49a | glycoprotein 49 A; leukocyte immunoglobulin-like receptor, subfamily B, member 4                  | -1.16                                | 0.0254  |
| H2-M9         | histocompatibility 2, M region locus 9                                                            | -1.21                                | 0.0161  |
| H2-Q5         | histocompatibility 2, Q region locus 5                                                            | -1.2                                 | 0.0452  |
| Irf8          | interferon regulatory factor 8                                                                    | -1.39                                | 0.0037  |
| Il1rl2        | interleukin 1 receptor-like 2                                                                     | -1.45                                | 0.0446  |
| Il18          | interleukin 18                                                                                    | -1.51                                | 0.041   |
| Lcp1          | lymphocyte cytosolic protein 1                                                                    | -1.21                                | 0.0106  |
| Pf4           | platelet factor 4                                                                                 | -1.67                                | 0.0268  |
| Prkcd         | protein kinase C, delta                                                                           | -1.27                                | 0.0269  |
| Ptpn6         | protein tyrosine phosphatase, non-receptor type 6                                                 | -1.22                                | 0.0463  |
| Ptprc         | protein tyrosine phosphatase, receptor type, C                                                    | -1.32                                | 0.0093  |
| Prg2          | proteoglycan 2, bone marrow                                                                       | -1.66                                | 0.0423  |
| Lilrb3        | similar to Leukocyte immunoglobulin-like receptor, subfamily B (with TM and ITIM domains), member | -1.44                                | 0.0067  |
| Tlr13         | toll-like receptor 13                                                                             | -1.41                                | 0.0192  |
| Tlr6          | toll-like receptor 6                                                                              | -1.33                                | 0.0101  |
| Tnf           | tumor necrosis factor                                                                             | -1.51                                | 0.025   |
| Tnfrsf1b      | TNF receptor superfamily, member 1b                                                               | -1.29                                | 0.0354  |
| Tnfaip8l2     | TNF, alpha-induced protein 8-like 2                                                               | -1.37                                | 0.0136  |

Plaque CD68+ macrophages from mice treated with PBS, control anti-miR or anti-miR33 oligonucleotides for 4 weeks were laser captured, RNA extracted and analyzed with the Affymetrix Mouse 430 2.0 arrays. Data are expressed as fold-change compared to control anti-miR. Immune response genes were significantly down-regulated in anti-miR33 compared to controls according to gene ontology (GO) analysis (Benjamini corrected p-value=8.1x10<sup>-3</sup>).
